# Supplementary material for: Tuning of the Na,K-ATPase by the beta subunit
Source: PubMed Central journal article supplement (PMC4742777; doi:10.1038/srep20442), 2016-02-05
Supplement: srep20442-s1.pdf [file srep20442-s1.pdf]

Supplementary Information for

Tuning of the Na,K-ATPase by the beta subunit

Florian Hilbers<sup>1,2,3</sup>, Wojciech Kopec<sup>4</sup>, Toke Jost Isaksen<sup>3,5</sup>, Thomas Hellesøe Holm<sup>3,5</sup>, Karin Lykke-Hartmann<sup>3,5,6</sup>, Poul Nissen<sup>1,2,3</sup>, Himanshu Khandelia<sup>4</sup> and Hanne Poulsen<sup>1,2,3,\*</sup>

<sup>1</sup>Danish Research Institute of Translational Neuroscience – DANDRITE, Nordic-EMBL Partnership for Molecular Medicine, Aarhus University, DK-8000 Aarhus, Denmark

<sup>2</sup>Department of Molecular Biology and Genetics, Aarhus University, DK-8000 Aarhus, Denmark

<sup>3</sup>Centre for Membrane Pumps in Cells and Disease – PUMPKIN, Danish National Research Foundation, DK-8000 Aarhus, Denmark

<sup>4</sup>MEMPHYS: Centre for Biomembrane Physics, University of Southern Denmark, DK-8000 Aarhus, Denmark

<sup>5</sup>Department of Biomedicine, Aarhus University, DK-8000 Aarhus, Denmark

<sup>6</sup>Aarhus Institute of Advanced Studies (AIAS), Aarhus University, DK-8000 Aarhus, Denmark

\*corresponding author

Contact: [hp@mb.au.dk](mailto:hp@mb.au.dk)

**Supplementary Table S1:** Fit-Parameters of charge translocation curves, rate constants at -140 mV and tilt angle predictions from MD simulations. Data are represented as mean  $\pm$  SD, n.d.: not determined.

| <i>Construct</i>                               | <i>Midpoint / mV</i> | <i>Valence</i>   | <i>Rate constant / s<sup>-1</sup></i> | <i>Tilt angle (MD)</i>     |
|------------------------------------------------|----------------------|------------------|---------------------------------------|----------------------------|
| <i><math>\alpha 1\beta 1</math></i>            | $-82.8 \pm 0.6$      | $0.796 \pm 0.01$ | $208.4 \pm 2.1$                       | $32.7^\circ \pm 1.8^\circ$ |
| <i><math>\alpha 1\beta 2</math></i>            | $-29.4 \pm 0.4$      | $0.907 \pm 0.01$ | $343.7 \pm 43.9$                      | $38.0^\circ \pm 0.7^\circ$ |
| <i><math>\alpha 1\beta 3</math></i>            | $-69.8 \pm 1.3$      | $0.851 \pm 0.03$ | $197.7 \pm 8.8$                       | $31.3^\circ \pm 0.9^\circ$ |
| <i><math>\alpha 2\beta 1</math></i>            | $-18.1 \pm 0.9$      | $0.842 \pm 0.03$ | $400.1 \pm 25.1$                      | n.d.                       |
| <i><math>\alpha 2\beta 2</math></i>            | $14.4 \pm 1.2$       | $0.948 \pm 0.03$ | $641.6 \pm 74.6$                      | n.d.                       |
| <i><math>\alpha 2\beta 3</math></i>            | $-17.7 \pm 1.6$      | $0.781 \pm 0.04$ | $497.1 \pm 29.8$                      | n.d.                       |
| <i><math>\alpha 3\beta 1</math></i>            | $-59.7 \pm 0.9$      | $0.735 \pm 0.02$ | $210.6 \pm 38.9$                      | n.d.                       |
| <i><math>\alpha 3\beta 2</math></i>            | $-28.7 \pm 1.1$      | $0.869 \pm 0.03$ | $385.8 \pm 12.4$                      | n.d.                       |
| <i><math>\alpha 3\beta 3</math></i>            | $-54.3 \pm 1.3$      | $0.775 \pm 0.03$ | $205.8 \pm 32.8$                      | n.d.                       |
| <i><math>\alpha 1\beta 1/\beta 2NT</math></i>  | $-80.2 \pm 0.2$      | $0.789 \pm 0.01$ | $174.6 \pm 16$                        | n.d.                       |
| <i><math>\alpha 1\beta 1/\beta 2TM</math></i>  | $-51.4 \pm 0.4$      | $0.847 \pm 0.01$ | $240.9 \pm 42$                        | $37.2^\circ \pm 0.7^\circ$ |
| <i><math>\alpha 1\beta 1/\beta 2CT</math></i>  | $-70.4 \pm 0.3$      | $0.837 \pm 0.01$ | $203.5 \pm 95$                        | n.d.                       |
| <i><math>\alpha 1\beta 1/\beta 2TMC</math></i> | $-86.2 \pm 1.4$      | $0.756 \pm 0.03$ | $220.3 \pm 56$                        | n.d.                       |
| <i><math>\alpha 1\beta 1AF</math></i>          | $-77.9 \pm 0.8$      | $0.852 \pm 0.02$ | $152.5 \pm 31$                        | n.d.                       |
| <i><math>\alpha 1\beta 1TAM</math></i>         | $-75.4 \pm 0.5$      | $0.857 \pm 0.01$ | $140.2 \pm 24$                        | n.d.                       |
| <i><math>\alpha 1\beta 1/3mut</math></i>       | $-64.7 \pm 0.8$      | $0.889 \pm 0.03$ | $203.8 \pm 28.5$                      | $36.0^\circ \pm 0.8^\circ$ |

**Supplementary Table S2:** Primers used to construct the  $\beta$ 1- $\beta$ 2 chimeras and  $\beta$ 1 mutants.

| <i>Primer</i>                                         | <i>Sequence</i>                                         |
|-------------------------------------------------------|---------------------------------------------------------|
| <i><math>\beta</math>2 fwd</i>                        | GTGCAAGGATCCAACGAATTCGCCCTT                             |
| <i><math>\beta</math>2 rev</i>                        | GAATTGAATTTAGCGGAAGCTTGATGCC                            |
| <i><math>\beta</math>1/<math>\beta</math>2NT fwd</i>  | CAGCTGCTGACCCGCCATCGCCATGGTCATCCAGAAAGA                 |
| <i><math>\beta</math>1/<math>\beta</math>2NT rev</i>  | AGAAGGATCTTAAACCAACTGCCACCGGTGCGGCCCATAAACTG            |
| <i><math>\beta</math>1/<math>\beta</math>2TM fwd</i>  | AGGAGTTTCTGGGCAGGACCGGTGGCAGCTGGGCCTTTATCCTC            |
| <i><math>\beta</math>1/<math>\beta</math>2TM rev</i>  | ATCCTGGCGGGGCCACTCGGTCCTGATATGTGGGGGTATGGTCGGA          |
| <i><math>\beta</math>1/<math>\beta</math>2CT fwd</i>  | GCCCGGACTCGCCCCGCGCCACCAAGATGGCCCGGGAAAGCCAAG           |
| <i><math>\beta</math>1/<math>\beta</math>2CT rev</i>  | GGCCAGTCGGTCCTGGTACTTGGGCTTAAATTCATATGGTGA              |
| <i><math>\beta</math>1/<math>\beta</math>2TMC fwd</i> | TATGGCTGCCTGGCTGGCATCTTCACCTCACCATGTGGGT                |
| <i><math>\beta</math>1 VSD fwd</i>                    | CTGATATGTGGGCTTAAAATCACTGACGGTGAGCAGCATCACTTG           |
| <i><math>\beta</math>1 VSD rev</i>                    | CAAGTGATGCTGCTCACCGTCAGTGATTTTAAGCCCACATATCAG           |
| <i><math>\beta</math>1 AF fwd</i>                     | AAAATATTACGTAGAATAGAAGGATGAAAGCCCAACTGCCACCGGTCCTGCCAG  |
| <i><math>\beta</math>1 AF rev</i>                     | CTGGGCAGGACCGGTGGCAGTTGGGCTTTCATCCTTCTATTCTACGTAATATTTT |
| <i><math>\beta</math>1 TAM fwd</i>                    | TGGCTGCCTGACTGCCATGTTTCATCGGAACCATCCA                   |
| <i><math>\beta</math>1 TAM rev</i>                    | TGGTTCCGATGAACATGGCAGTCAGGCAGCCATAAAAATAT               |

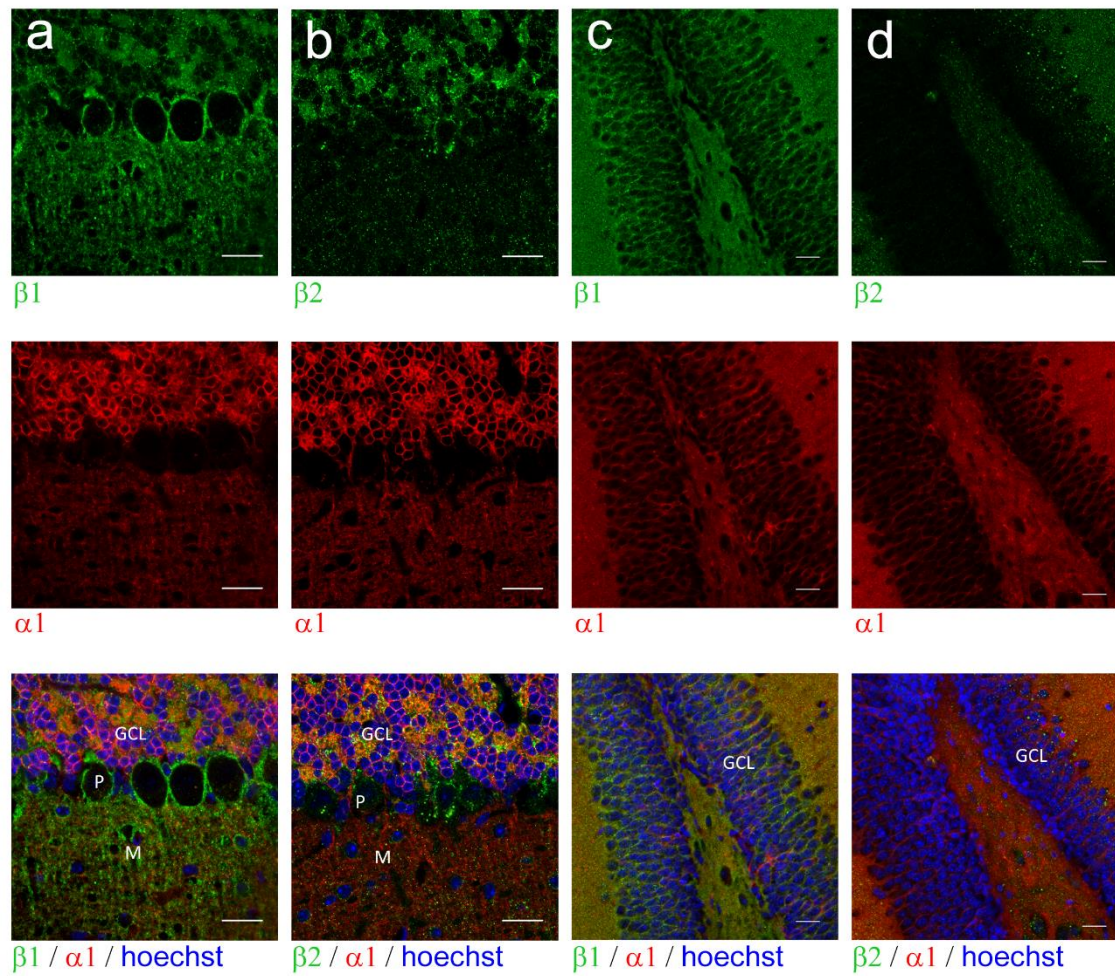

**Supplementary Figure S1: Localization of  $\alpha 1$ ,  $\beta 1$  and  $\beta 2$  subunit isoforms in cerebellum and dentate gyrus in brain slices from three month old mice.**

a-b) Fluorescence immunohistochemistry of  $\beta 1$  and  $\beta 2$  in cerebellum co-stained with  $\alpha 1$ .

c-d)  $\beta 1$  and  $\beta 2$  in the dentate gyrus of hippocampus co-stained with  $\alpha 1$ . GCL: granule cell layer. P: Purkinje cell layer. ML: molecular layer. Scale bars represent 20  $\mu\text{m}$ .

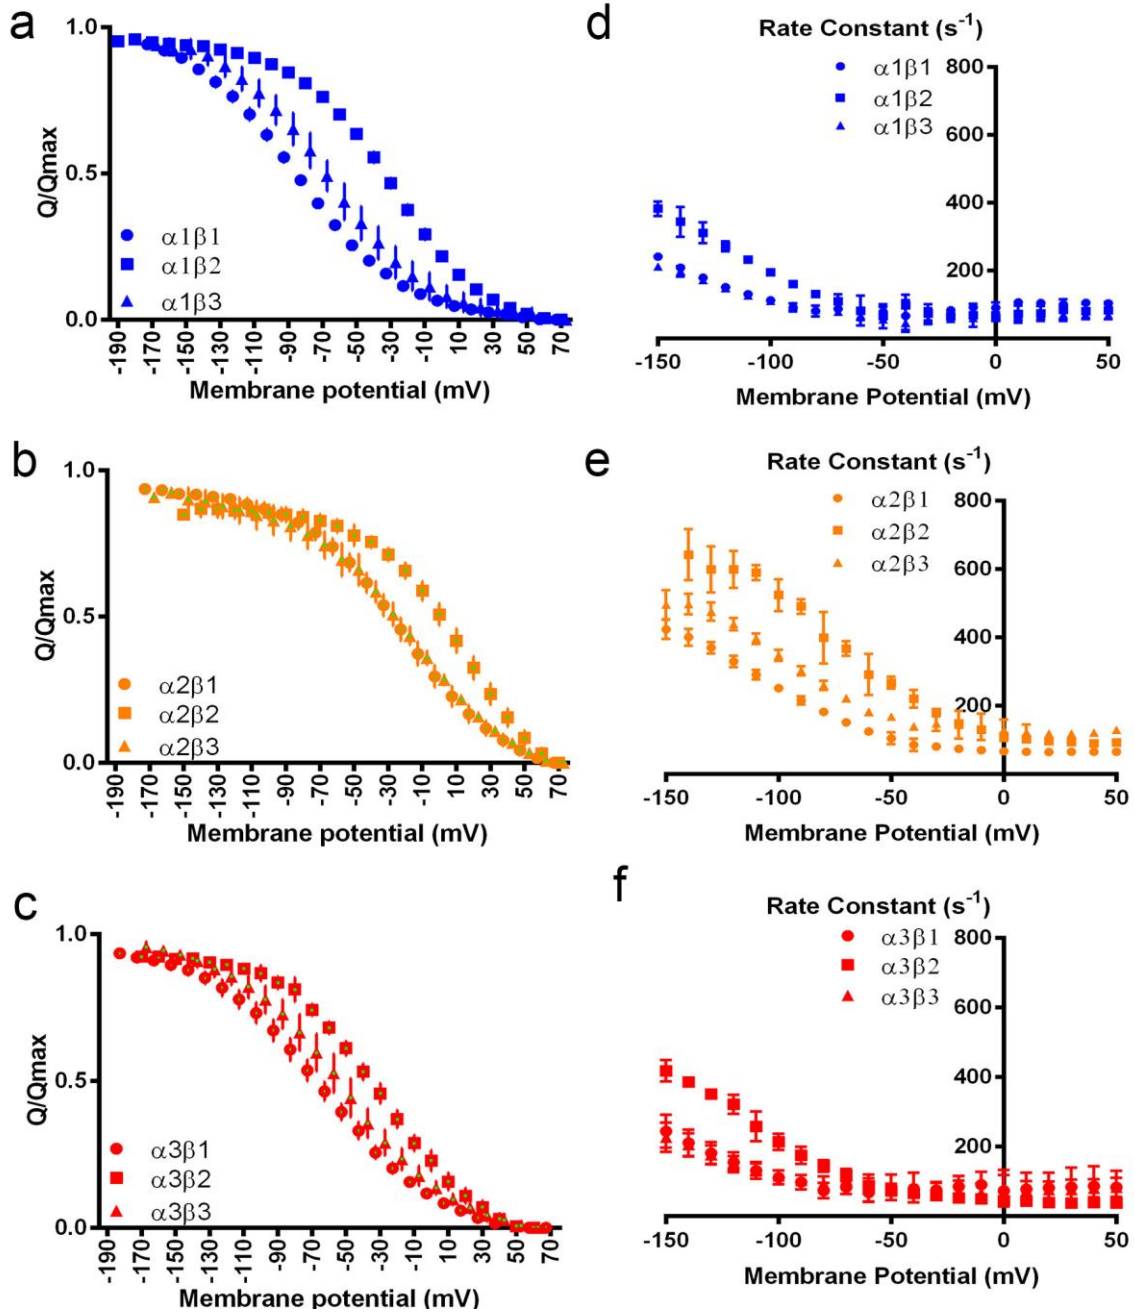

**Supplementary Figure S2: Voltage-dependence of charge translocation and rate constants of nine human  $\alpha\beta$  combinations.**

Three human  $\alpha$  isoforms were paired with the three  $\beta$  isoforms. The difference curves in  $K^+$ -free buffers with and without 10 mM ouabain were fitted with single exponentials and analyzed as described in Fig.1 yielding the charge translocation curves a), b), c) and on-rate constants d), e) and f) for  $\alpha 1$ ,  $\alpha 2$  and  $\alpha 3$  respectively.

N = 3-8 with oocytes from at least two *Xenopus laevis* females. Data are represented as mean  $\pm$  SD.

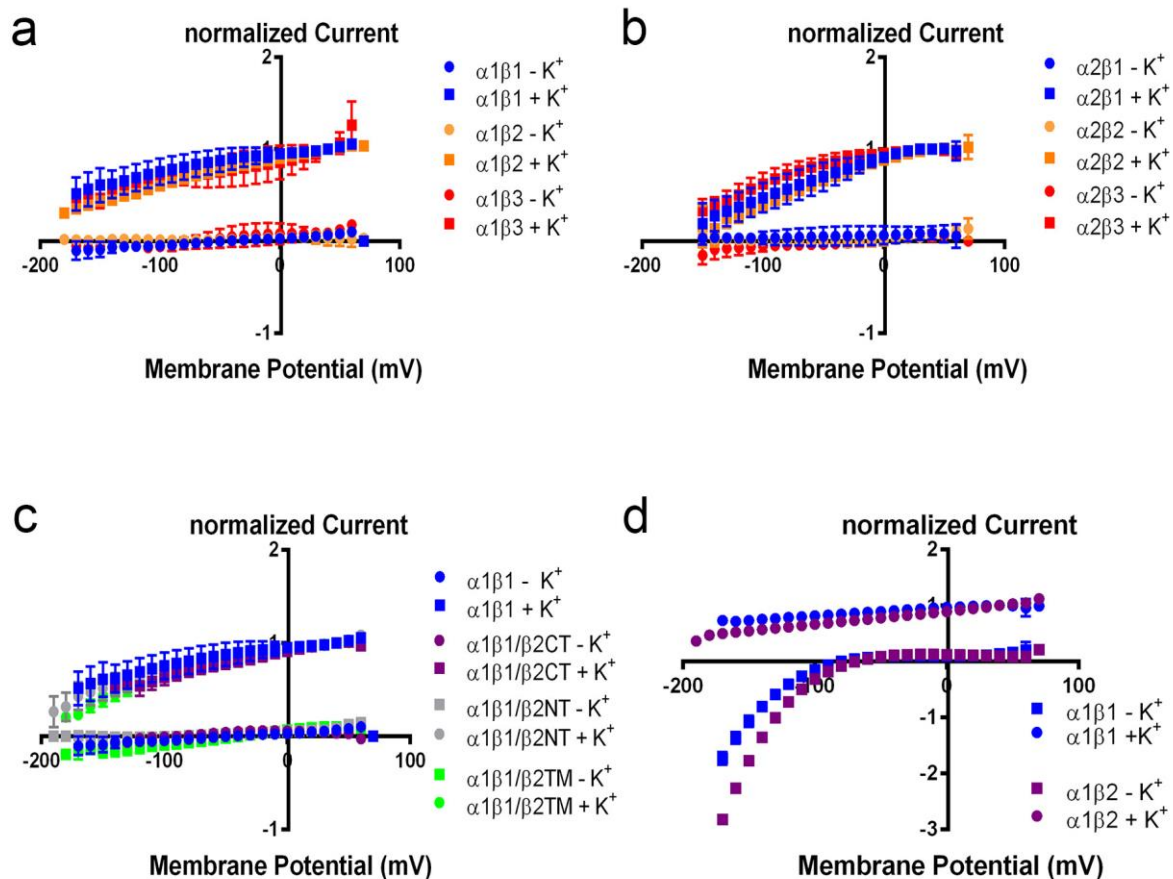

**Supplementary Figure S3: Voltage dependence of steady-state currents for six human  $\alpha\beta$  combinations and three chimeras.**

The forward ouabain-sensitive current induced by 15 mM  $K^+$  is similar for a)  $\alpha 1$ , b)  $\alpha 2$  and c) the chimeras.

d) In the absence of extracellular  $Na^+$ , the forward  $K^+$ -induced, ouabain-sensitive currents are similar with  $\alpha 1\beta 1$  and  $\alpha 1\beta 2$ . In the absence of  $K^+$  and  $Na^+$ , both combinations have inwardly rectifying currents<sup>20</sup>, slightly more pronounced for  $\beta 2$ .

$N = 3$  with oocytes from at least 2 *Xenopus laevis* females. Data are represented as mean  $\pm$  SD.



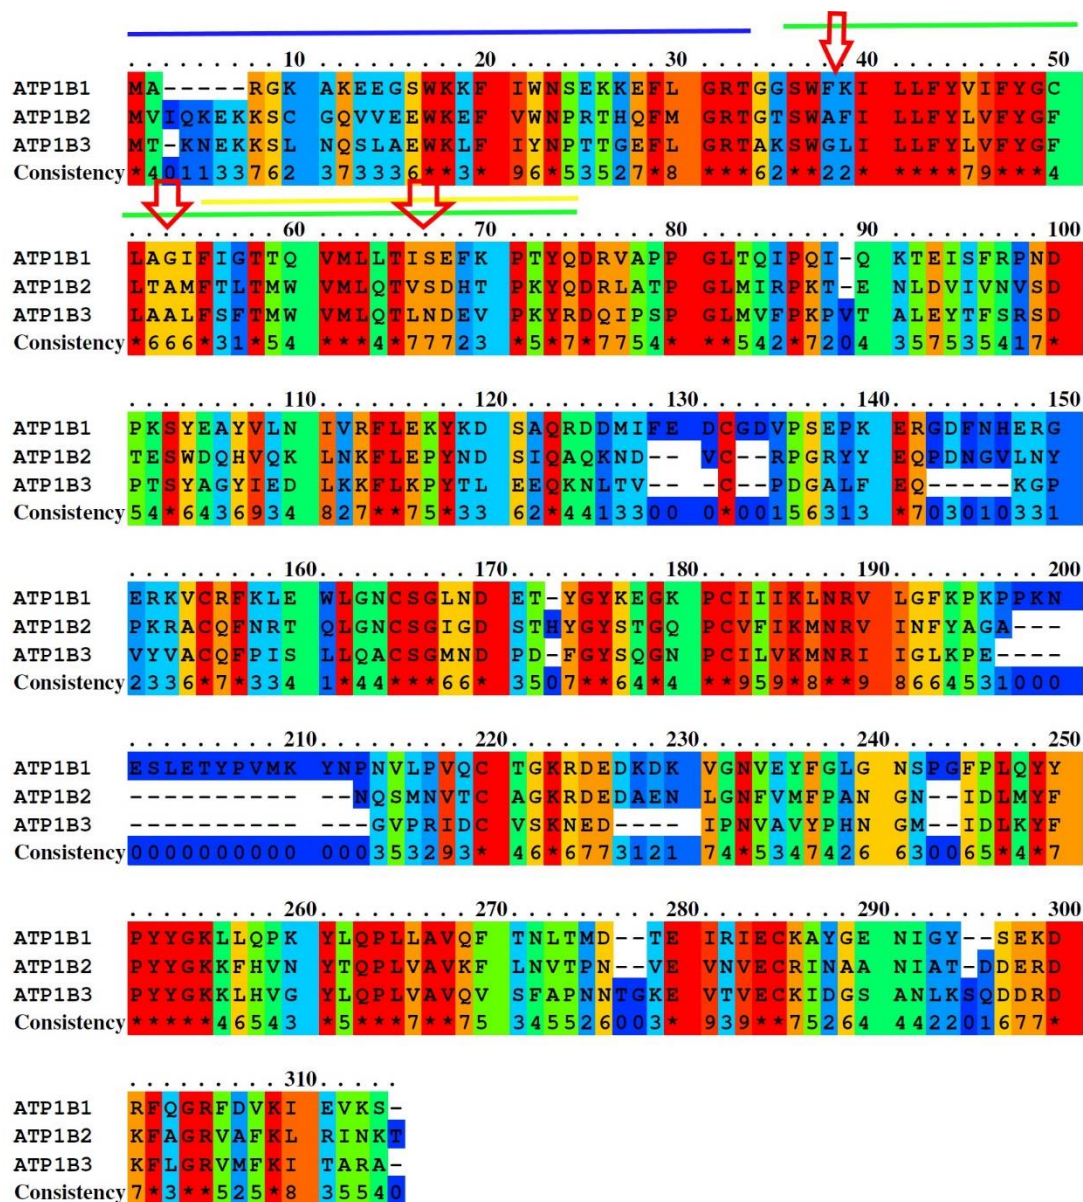

**Supplementary Figure S4: Sequence comparison of the three human  $\beta$  isoforms.**

The dark blue bar above the numbering denotes the area of  $\beta$ 1 that was exchanged for the equivalent area of  $\beta$ 2 to yield  $\beta$ 1/ $\beta$ 2NT, the green bar shows the area of  $\beta$ 1 that was exchanged for that of  $\beta$ 2 to yield  $\beta$ 1/ $\beta$ 2TM, and the yellow bar denotes the area swapped to yield  $\beta$ 1/ $\beta$ 2TMC. The unmarked area is the C-terminal domain, where the  $\beta$ 1 sequence was swapped with that of  $\beta$ 2 to yield  $\beta$ 1/ $\beta$ 2CT. The FK, AGI and VSD pockets are denoted by arrows. Fully conserved residues are shown in red. The lower the consistency score, the less conserved the residues. Figure was made using the PRALINE software server.

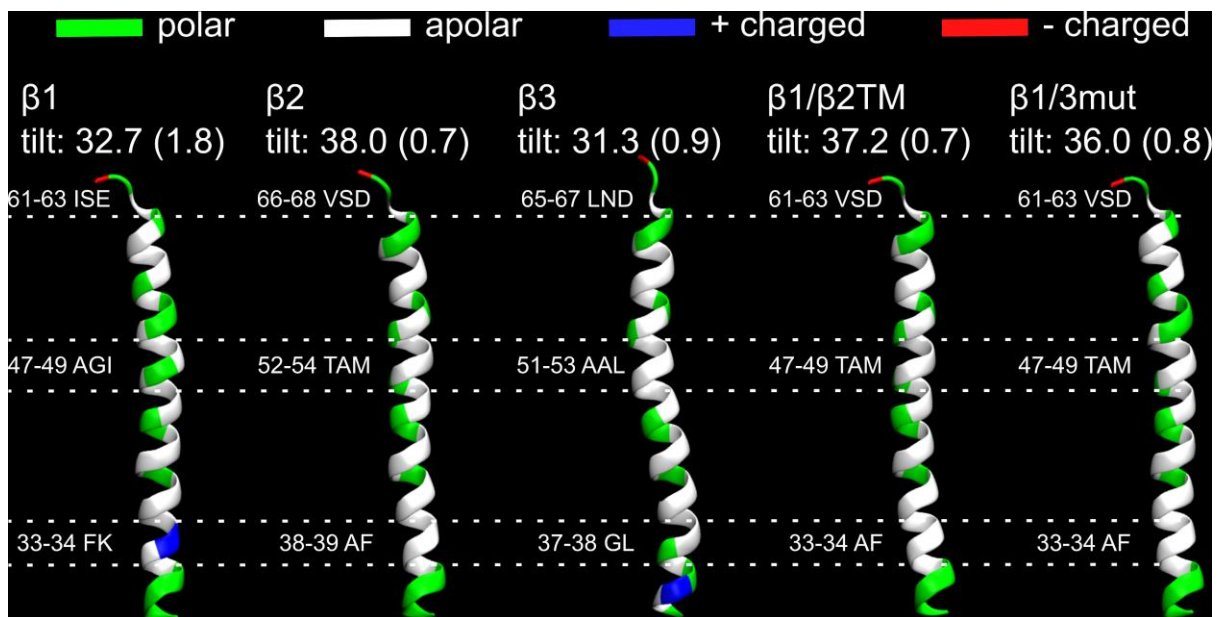

**Supplementary Figure S5: Comparison of the  $\beta$  transmembrane helices in MD simulations of  $\alpha 1\beta 1$ ,  $\alpha 1\beta 2$ ,  $\alpha 1\beta 3$ ,  $\alpha 1\beta 1/\beta 2\text{TM}$  and  $\alpha 1\beta 1/3\text{mut}$ .**

The  $\beta$  transmembrane helices alone are shown from MD simulations of the indicated full-length  $\beta$  in complex with  $\alpha 1$  and the  $\gamma$  subunit in a POPC lipid membrane. The 33-34 and 61-63 residues located at or near the membrane interfaces as well as the central 47-49 residues are indicated with dotted lines ( $\beta 1$  numbering, corresponding residues in  $\beta 2$  and  $\beta 3$  are labelled similarly). The helix tilt is given for each  $\beta$  helix, defined as the angle between the helix axis and the z-axis perpendicular to the membrane surface. Presented values are the averages from the last 40 ns of simulations, with error estimations obtained with block averaging. Polar, apolar and charged residues are color coded as indicated.



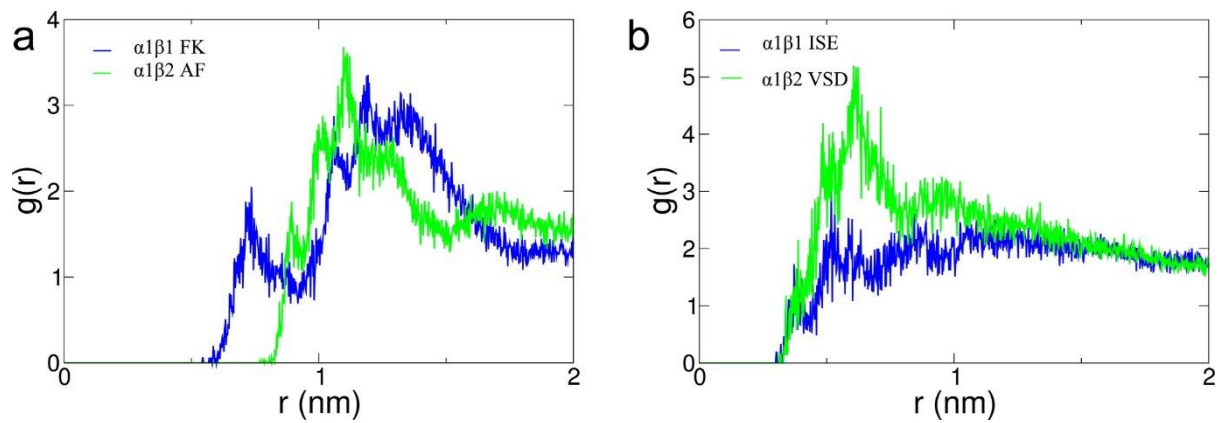

**Supplementary Figure S6: Radial distribution functions (RDFs) for the residues that anchor the transmembrane helix of the  $\beta$ 1 and  $\beta$ 2 subunits in the lipid bilayer and the lipid headgroups.**

a) Interactions between the POPC headgroups and the N-terminus of the  $\beta$  transmembrane helix (residues 33-34,  $\beta$ 1 numbering). The interactions of residues from  $\beta$ 1 are plotted in blue, from  $\beta$ 2 in green. The last 40 ns of the simulations were used to calculate RDFs.

b) Interactions between the POPC headgroups and the C-terminus of the  $\beta$  transmembrane helix (residues 61-63,  $\beta$ 1 numbering).
